# Supplementary material for: Comparison of antegrade and retrograde ureterolithotripsy for proximal ureteral stones: a systematic review and meta-analysis
Source: PubMed Central journal article supplement — Transl Androl Urol. 2021 Mar;10(3):1179–91. doi: 10.21037/tau-20-1296 (PMC8039618; doi:10.21037/tau-20-1296), 2021-03
Supplement: tau-10-03-1179-supplementary.pdf [file tau-10-03-1179-supplementary.pdf]

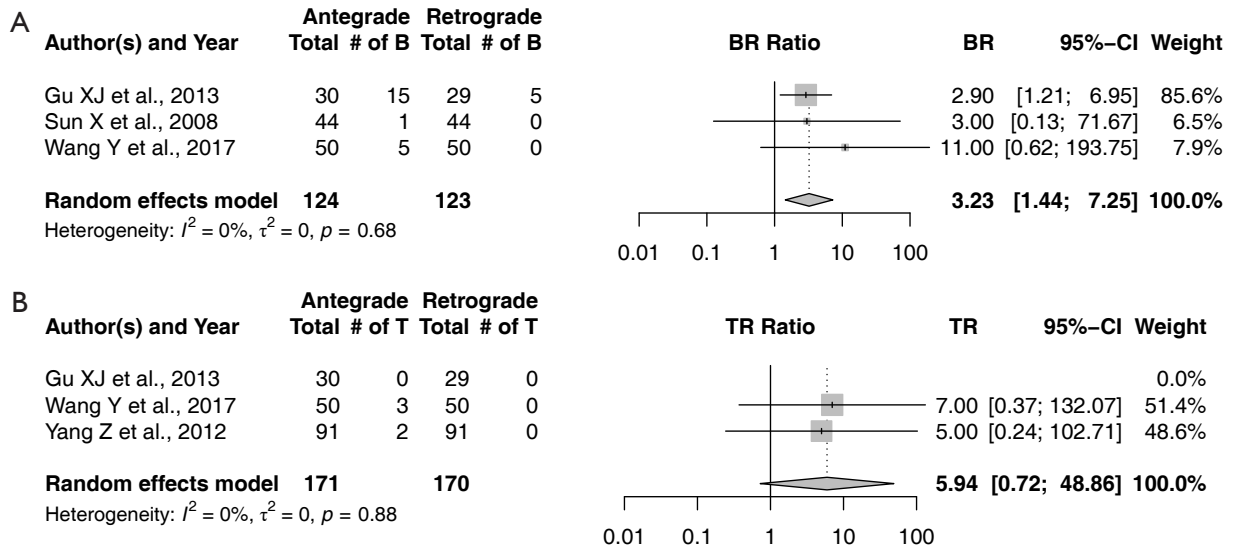

**Figure S1** Forest plots and meta-analyses of the bleeding rate (A) and transfusion rate (B) among all eligible studies. #, number; B, bleeding; BR, bleeding rate; CI, confidence interval; T, transfusion; TR, transfusion rate.
